# Supplementary material
Source: PubMed Central journal article supplement (PMC7095966)
Supplement: 41591_2005_BFnm1179_MOESM1_ESM.pdf [file 41591_2005_BFnm1179_MOESM1_ESM.pdf]

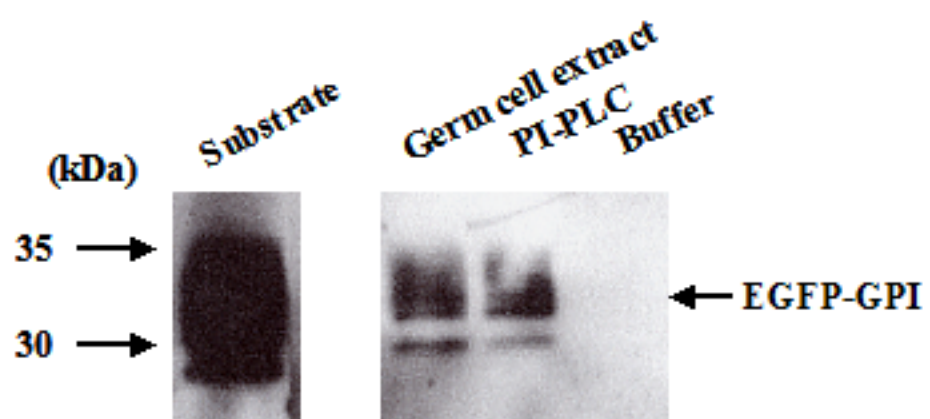

**Supplementary Figure 1.** Detection of GPIase activity in testicular germ cells.

Cell extract was prepared as described in Methods. Here, the conversion assay was performed using EGFP-GPI as substrate instead of PLAP. Released EGFP-GPI was detected by immunoblotting.
