# Supplementary material
Source: PubMed Central journal article supplement (PMC7095966)
Supplement: 41591_2005_BFnm1179_MOESM2_ESM.pdf [file 41591_2005_BFnm1179_MOESM2_ESM.pdf]

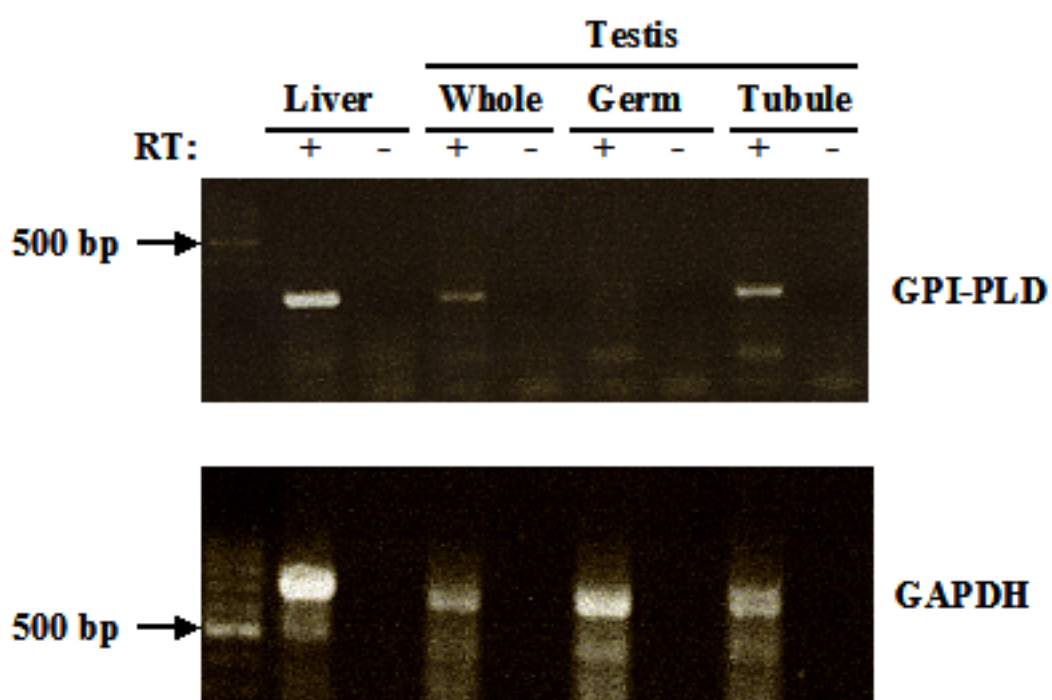

**Supplementary Figure 2.** Lack of *Gpi-pld* expression in the mouse testicular germ cell. RT-PCR was performed using primers, 5'-CCATCAACTGGCATAGGTGG-3' and 5'-TGTTGTCATTCCTCCTCAGC-3' for *Gpi-pld* and 5'-GTCATCAACGGGAAGCCCATCACCA-3' and 5'-TCTCGTGGTTCACACCCATCACAAA-3' for glyceraldehyde-3-phosphate dehydrogenase (GAPDH). RT, reverse transcriptase positive (+) or negative ( ) reaction. RNA of liver was employed as a positive control. Whole, whole testis; Germ, germ cell-enriched fraction; Tubule, seminiferous tubule-enriched fraction.
