# Supplementary material
Source: PubMed Central journal article supplement (PMC7095966)
Supplement: 41591_2005_BFnm1179_MOESM3_ESM.pdf [file 41591_2005_BFnm1179_MOESM3_ESM.pdf]

1 MGQGWATPGLPSFLFLLCCGHLLVLSQVATDHVTANQGITNQATTRSQ  
51 TTTHQATIDQTTQIPNLETDEAKADRFVEEYDRTAQVLLNEYAEANWQYN  
101 TNITIEGSKILLEKSTEVSNHTLKYGTRAKTFDVSNFQNSSIKRIIKKLQ  
151 NLDRAVLPPKELEEYNQILLDMETTYSLSNICYTNGTCMPLEPDLTNMMA  
201 TSRKYEELLWAWKSWRDKVGRAILPFFPKYVEFSNKIAKLNGYTDAGDSW  
251 RSLYESDNLEQDLEKLYQELQPLYLNLHAYVRRSLHRHYGSEYINLDGPI  
301 PAHLLGNMWAQTWSNIYDLVAPFPSAPNIDATEAMIKQGWTPRRIFKEAD  
351 NFFTSLGLLPVPEFWNKSMLEKPTDGREVVCHPSAWDFYNGKDFRIKQC  
401 TSVNMEDLVIAHHEMGGHIQYFMQYKDLPVTFREGANPGFHEAIGDIMALS  
451 VSTPKHLYSLNLLSTEGSGYEYDINFLMKMALDKIAFIPFSYLIDQWRWR  
501 VFDGSITKENYNQEWWSLRLKYQGLCPPVPRSQGDGDFPGSKFHVPANVPY  
551 VRYFVSFIIQFQFHEALCRAAGHTGPLHKCDIYQSKEAGKLLADAMKLG  
601 SKPWPEAMKLITGQPNMSASAMMNYFKPLTEWLVTENRRHGETLWPEYN  
651 WAPNTARAEGSTAESNRVNFLGLYLEPQQARVGQWVLLFLGVALLVATVG  
701 LAHRLYNIRNHHSRLRRPHRGPQFGSEVELRHS

**Supplementary Figure 3.** Proteomics analysis of the purified 100-kDa protein.

Four peptide fragments of mouse *Ace* (red) were detected on mass spectrometry and mapped for amino acid sequence of mouse testicular *Ace*. The core amino acid stretch for the peptidase active site is also indicated in blue.
