# Supplementary material
Source: PubMed Central journal article supplement (PMC7095966)
Supplement: 41591_2005_BFnm1179_MOESM4_ESM.pdf [file 41591_2005_BFnm1179_MOESM4_ESM.pdf]

(kDa) M. W. ACE-WT  
ACE-E414D  
ACE-H413K, H417K

158  
116  
97.2  
66.4  
55.6  
42.7  
34.6  
27.0  
20.0  
14.3

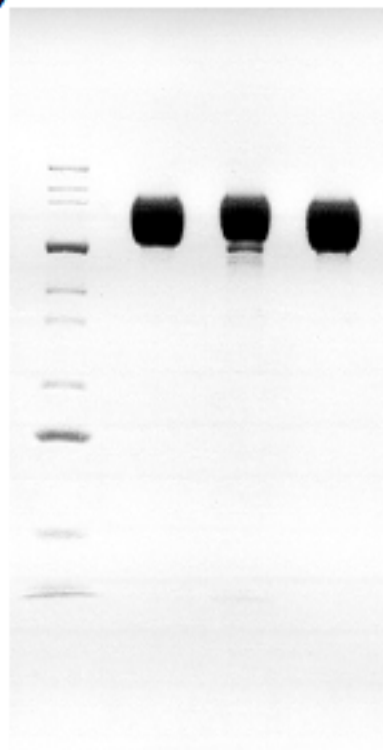

**Supplementary Figure 4.** The testicular isoform of wild-type (ACE-WT) and peptidase-inactivated mutants (ACE-E414D and ACE-H413K, H417K) were produced and purified as described in Methods. Ten microgram of protein was applied to SDS-PAGE and silver-stained.
