# Supplementary material
Source: PubMed Central journal article supplement (PMC7095966)
Supplement: 41591_2005_BFnm1179_MOESM5_ESM.pdf [file 41591_2005_BFnm1179_MOESM5_ESM.pdf]

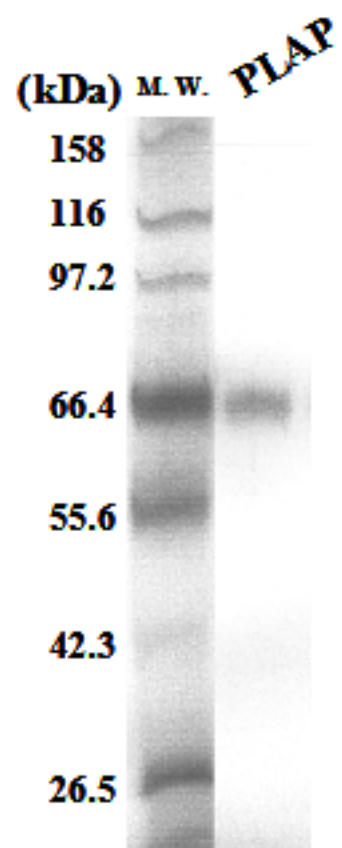

**Supplementary Figure 5.** PLAP substrate produced and purified as described in Methods. Ten microgram of protein was applied to SDS-PAGE and silver-stained.
