# Supplementary material
Source: PubMed Central journal article supplement (PMC7095966)
Supplement: 41591_2005_BFnm1179_MOESM7_ESM.pdf [file 41591_2005_BFnm1179_MOESM7_ESM.pdf]

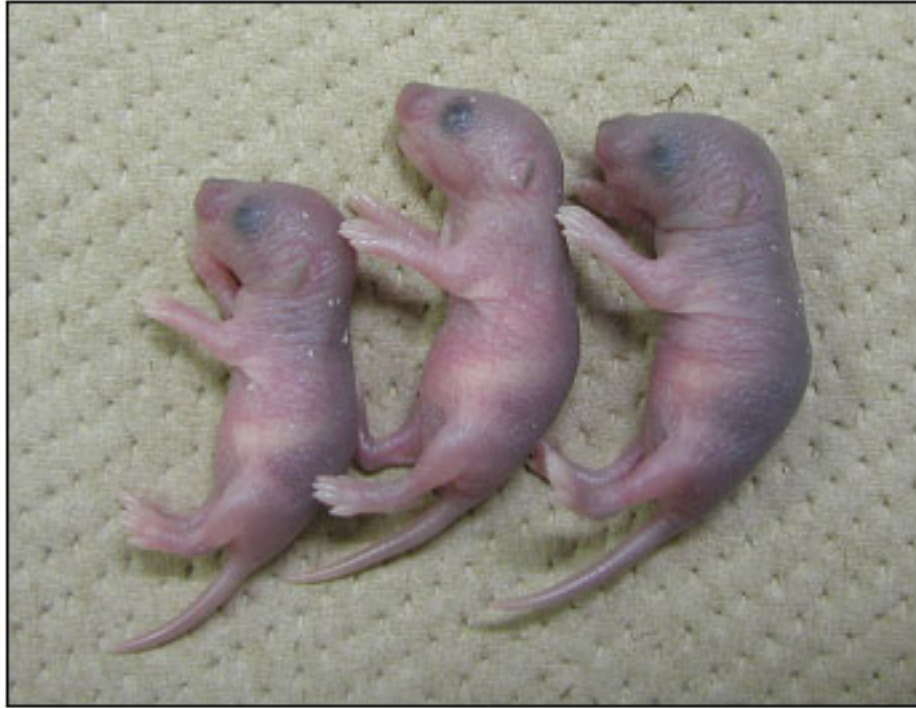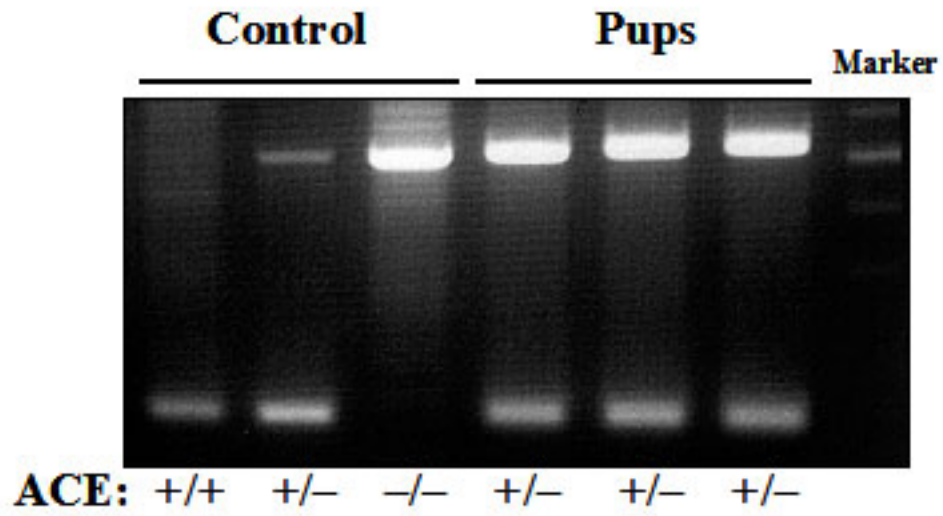

**Supplementary Figure 7.** Pups born from knockout sperm pretreated with wild-type Ace-t. The pups appeared normal and were all heterozygous for *Ace* knockout allele. Genotyping of mice was described elsewhere<sup>33</sup>. +/+, wild-type; +/-, heterozygote for *Ace* knockout allele; -/-, homozygote for *Ace* knockout allele (*Ace* knockout mouse).
